# Supplementary material for: Optimising the Flux Enhancer Dosing Strategy in a Pilot-Scale Anaerobic Membrane Bioreactor by Mathematical Modelling
Source: MDPI journal article supplement (doi:10.3390/membranes12020151), 2022-01-26
Supplement: s1 [file s1]

*Supplementary material*

# Optimising the flux enhancer dosing strategy in a pilot-scale anaerobic membrane bioreactor by mathematical modelling

Magela Odriozola\*, Jules B. van Lier, Henri Spanjers

Department of Water Management, Delft University of Technology, Stevinweg 1, 2628 CN Delft, the Netherlands.

\*Corresponding author: [m.odriozolaarbiza@tudelft.nl](mailto:m.odriozolaarbiza@tudelft.nl).

## **Simulink model S1:** Simulink® implementation of control tools for flux enhancer dosing to the pilot AnMBR

The Simulink® file *SimulationEnvironment.slx* contains the implementation of the control tools and integrated model described in Section 3.5. The simulation uses the parameter values in *Parameters.mat* and the initial conditions in *InitialConditions.mat*.

To run the simulation, open the file *SimulationEnvironment.slx* in Simulink®. Select the control tool using the manual switches. Select the simulation time, in seconds, and press *Run*.
